# Supplementary material for: Video Game Use as Risk Exposure, Protective Incapacitation, or Inconsequential Activity Among University Students
Source: Atypon-hosted journal article supplement (doi:10.1027/1864-1105/a000210), 2017-01-01
Supplement: 1864-1105_a000210_esm1.pdf [file 1864-1105_a000210_esm1.pdf]

**Electronic Supplementary Material 1****Survey Questionnaire Instrument Items:**

1. Are you currently a full-time college or university student? (Yes/No) (No = excluded from analysis)
2. How old are you? \_\_\_\_\_
3. What is your sex? (Male/Female)
4. How do you describe yourself (White, not Hispanic/Black, not Hispanic/Hispanic or Latino/Asian or Pacific Islander/American Indian or Alaskan Native/Other (Specify) \_\_\_\_\_)
5. At what college or university are you enrolled full-time? \_\_\_\_\_ (No response or not recognizable as a U.S. college or university = excluded from analysis)
6. In what year are you in school? (Freshman/Sophomore/Junior/Senior/Graduate or Continuing Student)
7. How much education does your mother have? (She did not finish high school/She graduated from high school or attained a GED/She has some education after high school/She graduated from college/I am not sure)
8. How much education does your father have? (He did not finish high school/He graduated from high school or attained a GED/He has some education after high school/He graduated from college/I am not sure)
9. During a typical week while you are at college, how many hours do you: (matrix question)
  - watch television and movies (on TV or a computer)? (\_\_\_\_\_ hours)
  - read books, magazines, and newspapers for school? (\_\_\_\_\_ hours)
  - read books, magazines, and newspapers for your own enjoyment? (\_\_\_\_\_ hours)

play video games? (including any games played on a game console, computer, or mobile device) (\_\_\_\_\_ hours) (0 response skips next video game use matrix question below)

10. Of the time you spend playing video games (including any games played on a game console, computer, or mobile device) in a typical week while you are at college, what percentage of time do you spend playing these different genres of video games? (must add up to 100%) (matrix question)

Action (Fighting, Shooter, Adventure, Platform, Stealth) (%)

Role-Playing (MMORPGs, Tactical RPGS) (%)

Simulation (Flight Simulation, Life Simulation) (%)

Strategy (Real-Time Strategy, Tower Defense) (%)

Sports (Racing, Other Sports) (%)

Puzzle (Trivia, Card) (%)

11. During a typical month while you are at college, on how many days do you: (matrix question)

exercise or participate in sports activities for at least 20 minutes that make you sweat and breathe hard, such as basketball, jogging, swimming laps, tennis, fast bicycling, or similar aerobic activities? (\_\_\_\_\_ days)

do stretching exercises, such as toe touching, knee bending, or leg stretching?  
(\_\_\_\_\_ days)

do exercises to strengthen or tone your muscles, such as push-ups, sit-ups, or weight lifting? (\_\_\_\_\_ days)

walk or bicycle for at least 30 minutes at a time, including to and from class or work?

(\_\_\_\_\_ days)

12. During a typical month while you are at college, on how many days do you: (matrix question)

smoke cigarettes? (\_\_\_\_\_ days)

smoke electronic cigarettes? (\_\_\_\_\_ days)

use chewing tobacco or snuff? (\_\_\_\_\_ days)

have at least one drink of alcohol? (\_\_\_\_\_ days)

have five or more drinks of alcohol in a row, within a few hours? (\_\_\_\_\_ days)

use marijuana ? (\_\_\_\_\_ days)

use any form of cocaine including powder, crack, or freebase? (\_\_\_\_\_ days)

sniff glue or breathe/inhale the contents of cans or sprays to get high? (\_\_\_\_\_ days)

use any other type of illegal drug, such as LSD, PCP, ecstasy, mushrooms, methamphetamine, or heroin? (\_\_\_\_\_ days)

take steroid pills or shots without a doctor's prescription? (\_\_\_\_\_ days)

take prescription drugs that were not prescribed to you? (\_\_\_\_\_ days)

ride in a car or other vehicle driven by someone who has been drinking alcohol?  
(\_\_\_\_\_ days)

13. During a typical month while you are at college, with how many different people do you have sexual intercourse, oral sex, or anal sex? (\_\_\_\_\_ people)

14. During a typical month while you are at college, how many times do you: (matrix question)

have sexual intercourse, oral sex, or anal sex? (\_\_\_\_\_ times)

have sexual intercourse or anal sex *using a condom*? (\_\_\_\_\_ times)

- have sexual intercourse or anal sex *without using a condom*? (\_\_\_\_\_ times)
15. During the past year while at college, how many times have you been pregnant or gotten someone pregnant? (\_\_\_\_\_ times)
16. During the past year while at college, how many times has someone had sexual intercourse, oral sex, or anal sex with you without your permission or when you were too intoxicated to give your consent? (\_\_\_\_\_ times)
17. During the past year while at college, how many times have you had sexual intercourse, oral sex, or anal sex when you are not sure they gave you permission or may have been too intoxicated to give their consent? (\_\_\_\_\_ times)
18. During the past year while at college, how many times did you: (matrix question)
- carry a weapon such as a gun, knife, or club? (not including carrying a weapon required for work) (\_\_\_\_\_ times)
  - get in a physical fight? (\_\_\_\_\_ times)
  - get in a physical fight in which you were injured and had to be treated by a doctor or nurse? (\_\_\_\_\_ times)
  - get bullied physically? (\_\_\_\_\_ times)
  - get bullied electronically online? (\_\_\_\_\_ times)
19. Sometimes people feel so depressed and hopeless about the future that they may consider attempting suicide, that is, taking some action to end their own life. During the past year while at college, how many times have you seriously considered suicide? (\_\_\_\_\_ times)
20. During the past year while at college, how many times have you attempted suicide? (\_\_\_\_\_ times)

21. How would you describe your weight? (very underweight/slightly underweight/about the right weight/slightly overweight/very overweight)

22. During a typical month at college, how many days do you diet to lose weight or to keep from gaining weight? (\_\_\_\_\_ days)

23. During a typical month at college, how many times do you vomit or take laxatives to lose weight or keep from gaining weight? (\_\_\_\_\_ times)

24. During a typical month at college, how many times do you take diet pills to lose weight or keep from gaining weight? (\_\_\_\_\_ times)
